# Supplementary material for: Application of Targeted Mass Spectrometry for the Quantification of Sirtuins in the Central Nervous System
Source: PubMed Central journal article supplement (PMC5071856; doi:10.1038/srep35391), 2016-10-20

## SUPPLEMENTARY INFORMATION

### Application of Targeted Mass Spectrometry for the Quantification of Sirtuins in the Central Nervous System

T. Jayasena<sup>a</sup>, A. Poljak<sup>a,b,c</sup>, N. Braidy<sup>a</sup>, L. Zhong<sup>b</sup>, B. Rowlands<sup>c</sup>, J. Muenchhoff<sup>a</sup>, R. Grant<sup>c,f</sup>, G. Smythe<sup>c</sup>, C. Teo<sup>d</sup>, M. Raftery<sup>b</sup>, and P. Sachdev<sup>a,e,\*</sup>

<sup>a</sup>Centre for Healthy Brain Ageing (CHeBA), School of Psychiatry, University of New South Wales, Sydney, Australia

<sup>b</sup>Bioanalytical Mass Spectrometry Facility, Mark Wainwright Analytical Centre, University of New South Wales, Sydney, Australia

<sup>c</sup>School of Medical Sciences, University of New South Wales, Sydney, Australia

<sup>d</sup>Minimally Invasive Cancer Centre, Prince of Wales Hospital, Sydney, Australia

<sup>e</sup>Neuropsychiatric Institute, the Prince of Wales Hospital, Sydney, Australia

<sup>f</sup>Sydney Medical School, University of Sydney, Sydney, Australia

\* Corresponding Author: Prof. P. Sachdev, Neuropsychiatric Institute, the Prince of Wales Hospital, Randwick NSW 2031, Australia. Tel: +61-2-93823763, Fax: +61-2-93823774  
E-mail: p.sachdev@unsw.edu.au

## SUPPLEMENTARY PROTOCOLS

### a) Selection of Peptides

Digested peptides were separated by nano-LC using a Cap-LC autosampler system (Waters, USA). Samples (5  $\mu$ l) were concentrated and desalted onto a micro C18 precolumn (500  $\mu$ m x 2 mm, Michrom Bioresources, Auburn, CA) with H<sub>2</sub>O:CH<sub>3</sub>CN (98:2, 0.05% HFBA) at 15  $\mu$ l/min. After a 4 min wash, the pre-column was automatically switched (Valco 10 port valve, Houston, TX) into line with a fritless nano column (75  $\mu$ m x ~12 cm) containing Magic C18 (~10cm, 200Å, Michrom). Peptides were eluted using a linear gradient of H<sub>2</sub>O:CH<sub>3</sub>CN (98:2, 0.1% formic acid) to H<sub>2</sub>O:CH<sub>3</sub>CN (55:45, 0.1% formic acid) at ~300 nl/min over 30 min. The precolumn was connected via a fused silica capillary (10 cm, 25  $\mu$ ) to a low volume tee (Upchurch Scientific) where high voltage (2400 V) was applied and the column tip positioned ~1 cm from the Z-spray inlet of an QToF Ultima API hybrid tandem mass spectrometer (Micromass, UK). Positive ions were generated by electrospray and the QToF operated in data dependent acquisition mode (DDA). A ToF MS survey scan was acquired (m/z 350-1700, 1 s) and the two largest multiply charged ions (counts > 20) were sequentially selected by Q1 for MS-MS analysis. Argon was used as collision gas and an optimum collision energy chosen (based on charge state and mass). Tandem mass spectra were accumulated for up to 2 s (m/z 50-2000). Peak lists were submitted to the database search program Mascot (Matrix Science, UK) to confirm identification of sirtuin peptides.

### b) Sirtuin standards and calibration curves

Isotopically labelled internal standards are excellent tools to normalise the variability in sample handling, injection volume and the performance of the mass spectrometer. Synthetic light and heavy peptides were purchased from GL Biochem (China) and Sigma-Aldrich (USA) respectively. Calibration curves in the range of 1-200 fmol/ $\mu$ l (three replicates using three transitions) were prepared. Heavy peptide (100 fmol/ $\mu$ l) was added to all standards and peptide ratios (light/heavy) were obtained using Skyline MRM analysis software. Average inter- and intra- assay %CV values (n=3) were calculated for each of the seven sirtuins. The linear range, limit of detection (LOD) and limit of quantification (LOQ) were determined. A signal-to-noise ratio of >3:1 and >10:1 was used to define LOD and LOQ respectively.

### Cell Culture

Cells were cultured in medium RPMI 1640 supplemented with 10% foetal bovine serum, 1% 1-glutamax, 1% antibacterial/antifungal, and 0.5% glucose. Cells were maintained at 37°C in a

humidified atmosphere containing 95% air/5% CO<sub>2</sub>. Cells were seeded into 24-well tissue culture plates to a density of  $1 \times 10^5$  cells 24 hours prior to experimentation. Neurons were prepared from the same mixed brain cell cultures as previously described (Guillemin et al., 2007). Briefly, cells were plated in 24-well culture plates coated with Matrigel (1/20 in Neurobasal) and maintained in Neurobasal medium supplemented with 1% B-27 supplement, 1% Glutamax, 1% antibiotic/antifungal, 0.5% HEPES buffer, and 0.5% glucose. Microglia were prepared from the mixed brain cell cultures using a published protocol (Guillemin et al., 2001). Briefly, the original mixed brain cell culture was shaken at 220 rpm for 2 h, floating cells were centrifuged, transferred to Permanox chamber slides (NUNC) at a density of  $5 \times 10^5$  cells/ml and grown in DMEM supplemented with 10% fetal calf serum (FCS), 1% L-glutamax, 0.5% glucose, IL-3 (300 IU/ml), macrophage colony-stimulating factor (M-CSF) (50 IU/ml), and 1% antibiotic/antifungal. Oligodendrocytes were prepared from the mixed brain cell cultures using a published protocol (Guillemin et al., 2001). Briefly, cells were seeded and grown in flasks coated with poly-L-lysine to confluence at 34°C, the permissive temperature, in DMEM/F12 supplemented with 10% FBS, 1% antibiotic/antifungal, 1% of G418 (Invitrogen, Melbourne, Australia) and then shifted to 39°C, the non-permissive temperature that leads to the 'differentiated' state for 72 hours. Cells were cultured in medium RPMI supplemented with 1% myelin binding protein, 1% L-glutamax, and 1% antibacterial/antifungal. CNS cell lines of neurons (SKNSH), astrocytes (U251), oligodendrocytes (M310) and microglia (CHM5) were cultured in medium RPMI supplemented with 10% foetal bovine serum, 1% L-glutamax, 1% antibacterial/antifungal, and 0.5% glucose. All cells were maintained at 37°C in a humidified atmosphere containing 95% air/5% CO<sub>2</sub>. Cells were seeded into 24-well tissue culture plates (3 wells per cell type) to a density of  $1 \times 10^5$  cells 24 hours prior to experimentation. Wells were pooled prior to cell lysis and probe sonication and all measurements were performed in triplicate.

## **PCR**

Briefly, for each reaction 2 µl of diluted cDNA, 10 µL of SYBR green master mix, 0.15 µL of 10 µM forward and reverse primers and 7.7 µl of nuclease-free water was used making a total volume of 20 µl. Q-PCR was carried out using the Mx3500P Real-Time PCR system (Stratagene, Australia). The primer sequences are shown in Supplementary Table S7. The relative expression levels of sirtuin transcripts were calculated using a mathematical model based on the individual Q-PCR primer efficiencies and the quantified values were normalized against the housekeeping gene 18S. From

these values, fold-differences in the levels of transcripts between individual cell cultures were calculated according to the formula  $2^{-\Delta\Delta Ct}$

### **Immunohistochemical Staining**

Formalin fixed blocks from the hippocampal region were embedded in paraffin and cut into 5  $\mu\text{m}$  sections on superfrost plus slides. For sirtuin staining, sections were deparaffinised in xylene for 20 min and rehydrated through graded alcohol treatment. Antigen retrieval was performed through the use of Target Retrieval solution pH 6 (DAKO, Denmark) and autoclaving at 121°C for 20 min. Endogenous peroxidase was blocked using 3% w/v hydrogen peroxide for 5 min and endogenous biotin was blocked as described previously. After incubation with 10% horse serum for 30 min to block non-specific binding, sections were incubated with anti-human sirtuin (1:250) primary antibodies (raised in rabbit), for 2 hours at ambient temperature. After three rinses, sections were incubated with secondary antibodies–biotinylated goat-anti rabbit or mouse (Vector Laboratories, USA, 1:200) for 30 min at ambient temperature followed by 30 min treatment with avidin-biotin-complex (ABC) elite (Vector). Labelling was visualized with liquid DAB and sections were counterstained and mounted. Negative controls for non-specific staining included replacement of the primary antibody by normal rabbit or mouse IgG.

### **Western Blotting**

The gel was electroblotted (20V, 110mA, 90mins) onto a nitrocellulose membrane in transfer buffer of 50mM tris, 40mM glycine, 1.3mM SDS, 20% methanol, pH 9.2. After transfer of proteins, the membrane was incubated in 10% skim milk powder solution containing primary sirtuin antibody. SIRT1, SIRT2 and SIRT3 rabbit polyclonal antibodies were used (1:1000 dilution, Abcam, UK), followed by a secondary antibody (1:100,000 dilution of anti-mouse IgG, Pierce, USA). See Supplementary Table S8 for full antibody details and dilutions. Chemiluminescence blots were developed using 1:1 solution of Super Signal West Femto luminol and peroxide buffer (Pierce, USA) according to manufacturer's instructions.

### **References**

Guillemin, G.J. *et al* Characterization of the kynurenine pathway in human neurons. *J Neurosci* **27**, 12884-92 (2007).

Guillemin, G. J. *et al*. Kynurenine pathway metabolism in human astrocytes: a paradox for neuronal protection. *J Neurochem* **78**, 1-13 (2001).

**Supplementary Table S1.** Sirtuin recovery using the full protocol (sirtuins run by SDS/PAGE) with spiking into matrices consisting of either buffer only (5 $\mu$ g sirtuin) or low abundance plasma (LAP) proteins with either 5 $\mu$ g or 2 $\mu$ g sirtuin spiked. Sirtuin 5 $\mu$ g spike recoveries were calculated in the LAP spike relative to sirtuin 5 $\mu$ g standard protein in buffer only samples. Sirtuin 2 $\mu$ g spike recoveries were calculated in the LAP spike relative to values extrapolated from the results of the sirtuin 5 $\mu$ g standard protein in buffer only samples. The peak ratios and percentage recovery values is from three transitions used for each of the two sirtuin peptides per sirtuin protein and were obtained from one gel lane per sirtuin protein. The gel on which these samples were run is shown in Figure S8.

|                                      | <b>Avg Peak Intensity Ratio (Light/Heavy)</b> | <b>Avg Peak Intensity Ratio (Light/Heavy)</b> | <b>% Recovery</b>    | <b>%Recovery</b>   |
|--------------------------------------|-----------------------------------------------|-----------------------------------------------|----------------------|--------------------|
|                                      | <b>DINTIEDAVK</b>                             | <b>TSVAGTVR</b>                               | <b>DINTIEDAVK</b>    | <b>TSVAGTVR</b>    |
| SIRT1 Std 5 $\mu$ g                  | 0.0106                                        | 0.0196                                        |                      |                    |
| SIRT1 Std 2 $\mu$ g (extrapolated)   | 0.0042                                        | 0.0078                                        |                      |                    |
| SIRT1 Std 5 $\mu$ g + 20 $\mu$ g LAP | 0.0080                                        | 0.0178                                        | 76.10                | 90.79              |
| SIRT1 Std 2 $\mu$ g + 20 $\mu$ g LAP | 0.0046                                        | 0.0101                                        | 108.50               | 128.83             |
|                                      | <b>LDELTLLEGVAR</b>                           | <b>IFSEVTPK</b>                               | <b>LDELTLLEGVAR</b>  | <b>IFSEVTPK</b>    |
| SIRT2 Std 5 $\mu$ g                  | 0.0656                                        | 0.0514                                        |                      |                    |
| SIRT2 Std 2 $\mu$ g (extrapolated)   | 0.0262                                        | 0.0206                                        |                      |                    |
| SIRT2 Std 5 $\mu$ g + 20 $\mu$ g LAP | 0.0523                                        | 0.0496                                        | 79.70                | 96.34              |
| SIRT2 Std 2 $\mu$ g + 20 $\mu$ g LAP | 0.0245                                        | 0.0219                                        | 93.51                | 106.31             |
|                                      | <b>LYTQNIDGLER</b>                            | <b>VSGIPASK</b>                               | <b>LYTQNIDGLER</b>   | <b>VSGIPASK</b>    |
| SIRT3 Std 5 $\mu$ g                  | 0.1015                                        | 0.0085                                        |                      |                    |
| SIRT3 Std 2 $\mu$ g (extrapolated)   | 0.0406                                        | 0.0034                                        |                      |                    |
| SIRT3 Std 5 $\mu$ g + 20 $\mu$ g LAP | 0.0620                                        | 0.0067                                        | 61.08                | 78.80              |
| SIRT3 Std 2 $\mu$ g + 20 $\mu$ g LAP | 0.0236                                        | 0.0035                                        | 58.13                | 102.9              |
|                                      | <b>VVVITQNIDELHR</b>                          | <b>NLLEIHGSLFK</b>                            | <b>VVVITQNIDELHR</b> | <b>NLLEIHGSLFK</b> |
| SIRT5 Std 5 $\mu$ g                  | 0.0224                                        | 0.0271                                        |                      |                    |
| SIRT5 Std 2 $\mu$ g (extrapolated)   | 0.00896                                       | 0.01084                                       |                      |                    |
| SIRT5 Std 5 $\mu$ g + 20 $\mu$ g LAP | 0.01812                                       | 0.0198                                        | 80.89                | 73.33              |
| SIRT5 Std 2 $\mu$ g + 20 $\mu$ g LAP | 0.0093                                        | 0.0104                                        | 103.80               | 95.94              |

|                                 | <b>FLVSNVDGLHVR</b> | <b>LVIVNLQPTK</b> | <b>FLVSNVDGLHVR</b> | <b>LVIVNLQPTK</b> |
|---------------------------------|---------------------|-------------------|---------------------|-------------------|
| SIRT6 Std 5µg                   | 0.0789              | 0.0837            |                     |                   |
| SIRT6 Std 2µg<br>(extrapolated) | 0.0316              | 0.0335            |                     |                   |
| SIRT6 Std 5µg +<br>20µg LAP     | 0.0571              | 0.0743            | 72.37               | 88.76             |
| SIRT6 Std 2µg +<br>20µg LAP     | 0.0326              | 0.0459            | 103.16              | 131.14            |

**Supplementary Table S2.** Human sirtuin peptide homology with guinea pig and mouse. Sequence variations from the human are highlighted in red.

| <b>Sirtuin</b> | <b>Human Peptide</b> | <b>Homology in Guinea Pig and Mice</b>                                      |
|----------------|----------------------|-----------------------------------------------------------------------------|
| <b>SIRT1</b>   | DINTIEDAVK           | Identical sequence found in both Guinea Pig and Mouse                       |
|                | TSVAGTVR             | In Mice: TSVAE <b>T</b> VR<br>In GP: TSVAE <b>T</b> VR                      |
| <b>SIRT2</b>   | LLDELTLEGVAR         | Identical sequence found in Guinea Pig<br>In Mice: LLDELTLEGV <b>T</b> R    |
|                | IFSEVTPK             | In mice: IFSE <b>A</b> TP <b>R</b><br>In GP: <b>L</b> FSDVTPK               |
| <b>SIRT3</b>   | LYTQNIDGLER          | Identical sequence found in both Guinea Pig and Mouse                       |
|                | VSGIPASK             | In mice: <b>A</b> SGIPASK<br>In GP: <b>A</b> SGIPASK                        |
| <b>SIRT4</b>   | RPIQHGFVFR           | In mice: RPIQH <b>I</b> DFVR<br>In GP: RPIQH <b>S</b> DFVR                  |
|                | FILTAWEK             | In mice: FILT <b>A</b> REQ<br>In GP: <b>F</b> TL <b>A</b> Q <b>D</b> K      |
| <b>SIRT5</b>   | VVVITQNIDELHR        | Identical sequence found in Mouse<br>In GP: <b>V</b> AVITQNIDEL <b>H</b> LR |
|                | NLLEIHGSLFK          | In mice: NLLEIHG <b>T</b> LFK<br>In GP: NL <b>V</b> EIHG <b>T</b> IFK       |
| <b>SIRT6</b>   | FLVSQNVDGLHVR        | Identical sequence found in both Guinea Pig and Mouse                       |
|                | LVIVNLQPTK           | Identical sequence found in both Guinea Pig and Mouse                       |
| <b>SIRT7</b>   | LLAESADLVTELQGR      | In mice: LLAES <b>E</b> DLVTELQGR<br>In GP: LLAES <b>E</b> DLVTELQGR        |
|                | DTIVHFGER            | Identical sequence found in both Guinea Pig and Mouse                       |

**Supplementary Table S3.** Sequences of all 7 human sirtuins and their isoforms (obtained from UniProt). The peptides used for MRM quantification experiments are highlighted in red and in larger font size. All sirtuin isoforms contain at least one of the peptides used for quantification, and both peptides are represented in the majority of isoforms.

|                        |                                                                                                                                                                                                                                                                                                                                                                                                                                                                                                                                                                                                                                                                                                                                                                                                                                                                                                                                                                                          |
|------------------------|------------------------------------------------------------------------------------------------------------------------------------------------------------------------------------------------------------------------------------------------------------------------------------------------------------------------------------------------------------------------------------------------------------------------------------------------------------------------------------------------------------------------------------------------------------------------------------------------------------------------------------------------------------------------------------------------------------------------------------------------------------------------------------------------------------------------------------------------------------------------------------------------------------------------------------------------------------------------------------------|
| <b>SIRT1 Isoform 1</b> | <p>&gt;sp Q96EB6 SIR1_HUMAN NAD-dependent protein deacetylase sirtuin-1<br/> OS=Homo sapiens GN=SIRT1 PE=1 SV=2<br/> MADEAALALQPGGSPAAGADREAASSPAGEPLRKRPRRDGPGLERSPGEPGGAAPER<br/> EVPAAARGCPGAAAAALWREAEEAAAAGGEQEAQATAAAGEGDNGPGLQGSPREP<br/> PLADNLYDEDDDDGEEEEEEEEAAAAIgyrdNLLFGDEIITNGFHSCESDEEDRASHASS<br/> DWTPRPRIGPYTFVQQHLMIGTDPRTILKDLLPETIPPELDDMTLWQIVINILSEPPKRRK<br/> KRK<b>DINTIEDAVK</b>LLQECKKIIVLTGAGVSVSCGIPDFRSRDGIYARLAVDFPDLDPDQA<br/> MFDIEYFRKDPRPFFKFAKEIYPGQFQPSLCHKFIALSDKEGKLLRNYTQNI DTLEQVAGIQ<br/> RIIQCHGSFATASCLICKYKVDCEAVRGDIFNQVPRCPCPADEPLAIMKPEIVFFGENL<br/> PEQFHRAMKYDKDEVDLLIVIGSSLKVRPVALIPSSIPHEVPQILINREPLPHLHFDV ELLGD<br/> CDVIINELCHRLGGYAKLCCNPVKLSEITEKPPRTQKELAYLSELPPTPLHVSEDSSSPERT<br/> SPPDSSVIVTLLDQAAKSNDLDVSESKGCMEEKPQEVQTSRNVESIAEQMENPDLKNV<br/> GSSTGEKNER<b>TSVAGTVR</b>KCWPNRVAKEQISRRLDGNQYLFLPPNRYIFHGAEVYSDS<br/> EDDLVSSSSCGSNSDSGTCQSPSLEEPMEDESEIEEFYNGLEDEPDVPERAGGAGFGTDG<br/> DDQEAINEAISVKQEV TDMNYP SNKS</p> |
| <b>SIRT1 Isoform 2</b> | <p>&gt;sp Q96EB6-2 SIR1_HUMAN Isoform 2 of NAD-dependent protein<br/> deacetylase sirtuin-1 OS=Homo sapiens GN=SIRT1<br/> MADEAALALQPGGSPAAGADREAASSPAGEPLRKRPRRDGPGLERSPGEPGGAAPER<br/> EVPAAARGCPGAAAAALWREAEEAAAAGGEQEAQATAAAGEGDNGPGLQGSPREP<br/> PLADNLYDEDDDDGEEEEEEEEAAAAIgyrdNLLFGDEIITNGFHSCESDEEDRASHASS<br/> DWTPRPRIGPYTFVQQHLMIGTDPRTILKDLLPETIPPELDDMTLWQIVINILSEPPKRRK<br/> KRK<b>DINTIEDAVK</b>LLQECKKIIVLTGAGVSVSCGIPDFRSRDGIYARLAVDFPDLDPDQA<br/> MFDIEYFRKDPRPFFKFAKEIYPGQFQPSLCHKFIALSDKEGKLLRNYTQNI DTLEQVAGIQ<br/> RIIQCHGSFATASCLICKYKVDCEAVRGDIFNQVPRCPCPADEPLAIMKPEIVFFGENL<br/> PEQFHRAMKYDKDEVDLLIVIGSSLKVRPVALIPSNQYLFLPPNRYIFHGAEVYSDSEDDV<br/> LSSSSCGSNSDSGTCQSPSLEEPMEDESEIEEFYNGLEDEPDVPERAGGAGFGTDGDDQ<br/> EAINEAISVKQEV TDMNYP SNKS</p>                                                                                                                                                                                                              |
| <b>SIRT2 Isoform 1</b> | <p>&gt;sp Q8IXJ6 SIR2_HUMAN NAD-dependent protein deacetylase sirtuin-2<br/> OS=Homo sapiens GN=SIRT2 PE=1 SV=2<br/> MAEPDPSHPLETQAGKVQEAQSDSDSEGGAGGEADMDFLRNLFSQTL SLGSQKER<br/> <b>LLELTLEGVAR</b>YMQSERCRRVICLVGAGISTSAGIPDFRSPSTGLYDNLEKYHLPYPE<br/> AIFEISYFKKHPEPFFALAKELYPGQFKPTICHYFMRLKDKGLLLRCYTQNI DTLERIAGLE<br/> QEDLVEAHGTFYTSCHVSASCRHEYPLSWMKEK<b>IFSEVTPK</b>CEDCQSLVKPDI VFFGES<br/> LPAFFSCMQSDFLKV D LLLVMGTSLQVQPFASLISKAPLSTPRLLINKEKAGQSDPFLG<br/> MIMGLGGGMDFDSKKAYRDVAWLGECDQGCLALAE LLGWKKELEDLVRREHASIDAQ<br/> SGAGV PNPSTSASP KSPPPAKDEARTTEREK PQ</p>                                                                                                                                                                                                                                                                                                                                                                                                      |



|                        |                                                                                                                                                                                                                                                                                                                                                                                                                                                                                                                                   |
|------------------------|-----------------------------------------------------------------------------------------------------------------------------------------------------------------------------------------------------------------------------------------------------------------------------------------------------------------------------------------------------------------------------------------------------------------------------------------------------------------------------------------------------------------------------------|
| <b>SIRT2 Isoform 2</b> | <p>&gt;sp Q8IXJ6-2 SIR2_HUMAN Isoform 2 of NAD-dependent protein deacetylase sirtuin-2 OS=Homo sapiens GN=SIRT2</p> <p>MDFLRNLFSTLSLGSQKER<b>LLDELTEGVAR</b>YMQSERCRRVICLVGAGISTSAGIPDFRSPSTGLYDNLEKYHLPYPEAIFEISYFKKHPEPFFALAKELYPGQFKPTICHYFMRLKDKG LLLRCYTQNIIDTLERIALGLEQEDLVEAHGTFYTSHCVSASCRHEYPLSWMKEK<b>IFSEVTPK</b>CEDCQSLVKPDIVFFGESLPARFFSCMQSDFLKVDLLVMGTSLQVQPFASLISKAPLSTPRLINKEKAGQSDPFLGMIMGLGGGMDFDSKAYRDVAWLGECDQGCLALAE LLGWKKELEDLVRREHASIDAQSGAGVNPSTASPKKSPPPAKDEARTTEREKPQ</p>                             |
| <b>SIRT2 Isoform 3</b> | <p>&gt;sp Q8IXJ6-3 SIR2_HUMAN Isoform 3 of NAD-dependent protein deacetylase sirtuin-2 OS=Homo sapiens GN=SIRT2</p> <p>MPLAECPSRCCLSSFRSVDFLRNLFSTLSLGSQKER<b>LLDELTEGVAR</b>YMQSERCRRVICLVGAGISTSAGIPDFRSPSTGLYDNLEKYHLPYPEAIFEISYFKKHPEPFFALAKELYPGQFKPTICHYFMRLKDKG LLLRCYTQNIIDTLERIALGLEQEDLVEAHGTFYTSHCVSASCRHEYPLSWMKEK<b>IFSEVTPK</b>CEDCQSLVKPDIVFFGESLPARFFSCMQSDFLKVDLLVMGTSLQVQPFASLISKAPLSTPRLINKEKAGQSDPFLGMIMGLGGGMDFDSKAYRDVAWLGECDQGCLALAE LLGWKKELEDLVRREHASIDAQSGAGVNPSTASPKKSPPPAKDEARTTEREKPQ</p>            |
| <b>SIRT2 Isoform 4</b> | <p>&gt;sp Q8IXJ6-4 SIR2_HUMAN Isoform 4 of NAD-dependent protein deacetylase sirtuin-2 OS=Homo sapiens GN=SIRT2</p> <p>MAEPDPSHPLETQAGKVQEAQDSDSDSEGGAGGEADMDFLRNLFSTLSLGSQKER<b>LLDELTEGVAR</b>YMQSERCRRVICLVGAGISTSAGIPDFRSPSTGLYDNLEKYHLPYPEAIFEISYFKKHPEPFFALAKELYPGQFKPTICHYFMRLKDKG LLLRCYTQNIIDTLERIALGLEQEDLVEAHGTFYTSHCVSASCRHEYPLSWMKEK<b>IFSEVTPK</b>CEDCQSLVKPDIVFFGESLPARFFSCMQSDFLKVDLLVMGTSLQGRGLAG</p>                                                                                                            |
| <b>SIRT2 Isoform 5</b> | <p>&gt;sp Q8IXJ6-5 SIR2_HUMAN Isoform 5 of NAD-dependent protein deacetylase sirtuin-2 OS=Homo sapiens GN=SIRT2</p> <p>MAEPDRRRVICLVGAGISTSAGIPDFRSPSTGLYDNLEKYHLPYPEAIFEISYFKKHPEPFFALAKELYPGQFKPTICHYFMRLKDKG LLLRCYTQNIIDTLERIALGLEQEDLVEAHGTFYTSHCVSASCRHEYPLSWMKEK<b>IFSEVTPK</b>CEDCQSLVKPDIVFFGESLPARFFSCMQSDFLKVDLLVMGTSLQVQPFASLISKAPLSTPRLINKEKAGQSDPFLGMIMGLGGGMDFDSKAYRDVAWLGECDQGCLALAE LLGWKKELEDLVRREHASIDAQSGAGVNPSTASPKKSPPPAKDEARTTEREKPQ</p>                                                                   |
| <b>SIRT3 Isoform 1</b> | <p>&gt;sp Q9NTG7 SIR3_HUMAN NAD-dependent protein deacetylase sirtuin-3, mitochondrial OS=Homo sapiens GN=SIRT3 PE=1 SV=2</p> <p>MAFWGWRAAAALRLWGRVVERVEAGGGVGPFPQACGCRLVLGGRDDVSAGLRGSHG ARGEP</p> <p>LDPARPLQRPPRPEVPRAFRRQPRAAAPSFFFSSIKGGRRSISFSV GASSVVGSGSSDKG KLSLQDVAELIRARACQRVVVMVGAGISTPSGIPDFRSPGSLYLNQQYDLPYPEAIFEL PFFFHNPKPFFTLAKELYPGNYKPNVTHYFLRLLHDKG LLLR<b>LYTQNIIDGLERVSGIPASK</b>LVEAHGTFASATCTVCQRPFGEDIRADVMADRVP RCPVCTGVVKPDIVFFGEPLPQRFLLVVDFPMADLLLILGTSLEVEPFASL TEAVRSSVPRLLINRDLVGPLAWHPRSRDVA</p> |

|                        |                                                                                                                                                                                                                                                                                                                                                                                                                                                                                             |
|------------------------|---------------------------------------------------------------------------------------------------------------------------------------------------------------------------------------------------------------------------------------------------------------------------------------------------------------------------------------------------------------------------------------------------------------------------------------------------------------------------------------------|
|                        | QLGDVVHGVESLVELLWTEEMRDLVQRETGKLDGPKD                                                                                                                                                                                                                                                                                                                                                                                                                                                       |
| <b>SIRT3 Isoform 2</b> | >sp Q9NTG7-2 SIR3_HUMAN Isoform 2 of NAD-dependent protein deacetylase sirtuin-3, mitochondrial OS=Homo sapiens GN=SIRT3<br>MVGAGISTPSGIPDFRSPGSLYSNLQYDLPYPEAIFELPFFHNPKPFFTLAKELYPGNY<br>KPNVTHYFLRLLHDKGLLLR <b>LYTQNI DGLERVSGIPASK</b> LVEAHGTFASATCTVCQR<br>PFPGEDIRADVMADRVPRCPVCTGVVVKPDIVFFGEPLPQRFLHVVDFPMADLLILGTS<br>LEVEPFASLTEAVRSSVPRLLINRDLVGPLAWHPRSRDVAQLGDVVHGVESLVELLWTE<br>EEMRDLVQRETGKLDGPKD                                                                         |
| <b>SIRT4</b>           | >sp Q9Y6E7 SIR4_HUMAN NAD-dependent protein lipoamidase sirtuin-4, mitochondrial OS=Homo sapiens GN=SIRT4 PE=1 SV=1<br>MKMSFALTFRSAKGRWIANPSQPCSKASIGLFPASPPLDPEKVKELQRFITLSKRLVLM<br>TGAGISTESGIPDYRSEKVGLYARTDR <b>RPIQHGD FVR</b> SAPIRQRYWARNFVGWPQFS<br>SHQPNPAHWALSTWEKLGKLYWLVTQNV DALHTKAGSRRLTELHGCM DRVLC LDCGE<br>QTPRGVLQERFQVLNPTWSAEAHGLAPDGDVFLSEEQVRSFQVPTCVQC GGHLKPDV<br>VFFGDTVNPDKVDFVHKRVKEADSLLVGSSLQVYSGYR <b>FILTAWEK</b> KLPIAILNIGPTR<br>SDDLACLKLN SRCGELLPLIDPC |
| <b>SIRT5 Isoform 1</b> | >sp Q9NXA8 SIR5_HUMAN NAD-dependent protein deacylase sirtuin-5, mitochondrial OS=Homo sapiens GN=SIRT5 PE=1 SV=2<br>MRPLQIVPSRLISQLYCGLKPPASTRNQICLKMARPSSSMADFRKFFAKAKHIVIISGAGV<br>SAESGVPTFRGAGGYWRKWQAQDLATPLAFAHNPSRVWEFYHYRREVMGSKEPNAG<br>HRAIAECETRLGKQGRR <b>VVITQNI DELHR</b> KAGTK <b>NLLEIHGSLFK</b> TRCTSCGVVA<br>ENYKSPICPALS GKG APEPGTQDASIPVEKLP RCEEAGCGLLRPHV VWFGENLDPAILE<br>EVDRELAHCDLCLVVGTS SVVYPAAMFAPQVAARGVPVAEFNTETTPATNRF RHFHQG<br>PCGTTLPEALACHENETVS      |
| <b>SIRT5 Isoform 2</b> | >sp Q9NXA8-2 SIR5_HUMAN Isoform 2 of NAD-dependent protein deacylase sirtuin-5, mitochondrial OS=Homo sapiens GN=SIRT5<br>MRPLQIVPSRLISQLYCGLKPPASTRNQICLKMARPSSSMADFRKFFAKAKHIVIISGAGV<br>SAESGVPTFRGAGGYWRKWQAQDLATPLAFAHNPSRVWEFYHYRREVMGSKEPNAG<br>HRAIAECETRLGKQGRR <b>VVITQNI DELHR</b> KAGTK <b>NLLEIHGSLFK</b> TRCTSCGVVA<br>ENYKSPICPALS GKG APEPGTQDASIPVEKLP RCEEAGCGLLRPHV VWFGENLDPAILE<br>EVDRELAHCDLCLVVGTS SVVYPAAMFAPQVAARGVPVAEFNTETTPATNRF SHLISISS<br>LIIKN             |
| <b>SIRT5 Isoform 3</b> | >sp Q9NXA8-3 SIR5_HUMAN Isoform 3 of NAD-dependent protein deacylase sirtuin-5, mitochondrial OS=Homo sapiens GN=SIRT5<br>MRPLQIVPSRLISQLYCGLKPPASTRNQICLKMARPSSSMADFRKFFAKAKHIVIISGAGV<br>SAESGVPTFRGAGGYWRKWQAQDLATPLAFAHNPSRVWEFYHYRREVMGSKEPNAG<br>HRAIAECETRLGKQGRR <b>VVITQNI DELHR</b> KAGTK <b>NLLEIHGSLFK</b> TRCTSCGVVA<br>ENYKSPICPALS GKG CEEAGCGLLRPHV VWFGENLDPAILEEVDRELAHCDLCLVVGTS<br>SVVYPAAMFAPQVAARGVPVAEFNTETTPATNRF RHFHQGPCGTTLPEALACHENETV<br>S                     |
| <b>SIRT5 Isoform 4</b> | >sp Q9NXA8-4 SIR5_HUMAN Isoform 4 of NAD-dependent protein deacylase                                                                                                                                                                                                                                                                                                                                                                                                                        |

---

sirtuin-5, mitochondrial OS=Homo sapiens GN=SIRT5  
MGSKEPNAGHRAIAECETRLGKQGR**VVITQNI**DELHRKAGTK**NLLEIHGSLFKT**  
RCTSCGVVAENYKSPICPALS<sup>G</sup>GKGAPEPGTQDASIPVEKLP**R**CEEAGCGLLRPHV**W**  
GENLDPAIL**E**VDRELAHCDLCLVVG**T**SSVVYPAAMFAPQVAARGVPVAEFNTETTPAT  
NRFRHFQGPCGTT**L**PEALACHEN**E**TVS

---

**SIRT6 Isoform 1** >sp|Q8N6T7|SIR6\_HUMAN NAD-dependent protein deacetylase sirtuin-6  
OS=Homo sapiens GN=SIRT6 PE=1 SV=2  
MSVNYAAGLSPYADK**G**KCGLPEIFDPPEELERK**V**WELARLVWQSSSVFHTGAGISTAS  
GIPDFR**G**PHGVW**T**MEERGLAPK**F**DTTFESARPTQ**T**HMALVQLERVGLL**R****FLVSQNV**  
**DGLHVR**SGFPRDKLAELHGNMFVEECAKCKTQYVRD**T**VVGT**M**GLKATGRLCT**V**AKA  
RGLRACRGELRDTILDWEDSLPDRDLALADEASRNADLSITLGTSLQIRPSGNLPLATKRR  
GGR**LVIVNLQPTK**HDRHADLRIHG**V**DEV**M**TRLMKHLGLEIPAWDGPRVLERALPPL  
PRPPTPKLEPK**E**SPTRINGSIPAGPKQ**E**PCAQHNGSEPA**S**PKRERPTSPAPHRPPKRVKA  
KAVPS

---

**SIRT6 Isoform 2** >sp|Q8N6T7-2|SIR6\_HUMAN Isoform 2 of NAD-dependent protein  
deacetylase sirtuin-6 OS=Homo sapiens GN=SIRT6  
MSVNYAAGLSPYADK**G**KCGLPEIFDPPEELERK**V**WELARLVWQSSSVFHTGAGISTAS  
GIPDFR**G**PHGVW**T**MEERGLAPK**F**DTTFESARPTQ**T**HMALVQLERVGLL**R****FLVSQNV**  
**DGLHVR**SGFPRDKLAELHGNMFVEECAKCKTQYVRD**T**VVGT**M**GLKATGRLCT**V**AKA  
RGLRACRNADLSITLGTSLQIRPSGNLPLATKRRGGR**LVIVNLQPTK**HDRHADLRIHG**V**  
VDEV**M**TRLMKHLGLEIPAWDGPRVLERALPPLPRPPTPKLEPK**E**SPTRINGSIPAGPKQ  
EPCAQHNGSEPA**S**PKRERPTSPAPHRPPKRVK**A**KAVPS

---

**SIRT7 Isoform 1** >sp|Q9NRC8|SIR7\_HUMAN NAD-dependent protein deacetylase sirtuin-7  
OS=Homo sapiens GN=SIRT7 PE=1 SV=1  
MAAGGLSRSERKAAERVRRLREEQQRERLRQVSRILR**K**AAEAERSAEEGR**LLAESADLV**  
**TELQGR**SRRREGLKRRQEEV**C**DDPEELRGKVRELASAVRNAKYLVVYTGAGISTAASIP  
DYRGPNGVW**T**LLQKGRSVSAADLSEA**E**PTLTHMSITRLHEQKLVQHVV**S**QNC**D**GLHLR  
SGLPRTAISELHGNMYIEVCTSCVPNREYVRVFDVTERTALHRHQTGRTCHKCGTQ**L****R****D**  
**TIVHFGER**GTLGQPLNWEAATEAASRADTILCGSSLVK**L**KYPRLWCMTKPPSRRPKL  
YIVNLQWTPKDDWAALKLHGKDDVMRL**L**MAELGLEIPAYS**R**WQDPIFSLATPLRAGE  
EGSHSRKSLCRSREEAPP**G**DRGAPLSSAPILGGW**F**GRGCTK**R**TKR**K**VT

---

**SIRT7 Isoform 2** >sp|Q9NRC8-2|SIR7\_HUMAN Isoform 2 of NAD-dependent protein  
deacetylase sirtuin-7 OS=Homo sapiens GN=SIRT7  
MAAGGLSRSERKAAERVRRLREEQQRERLRQVSRILR**K**AAEAERSAEEGR**LLAESADLV**  
**TELQGR**SRRREGLKRRQEEV**C**DDPEELRGKVRELASAVRNAKYLVVYTGAGISTAASIP  
DYRGPNGVW**T**LLQKGRSVSAADLSEA**E**PTLTHMSITRLHEQKLV**R**ALGGWYTCQGPGR  
APWCPVGN

---

**SIRT7 Isoform 3** >sp|Q9NRC8-3|SIR7\_HUMAN Isoform 3 of NAD-dependent protein  
deacetylase sirtuin-7 OS=Homo sapiens GN=SIRT7  
MPGPRRRSPSACPQVSRILR**K**AAEAERSAEEGR**LLAESADLVTELQGR**SRRREGLKRR

---

---

QEEVCDDPEELRGKVRELASAVRNAKYLVVYTGAGISTAASIPDYRGPNGVWVWTLQKGR  
SVSAADLSEAEPVTLTHMSITRLHEQKLVQHVVVSQNCGLHLRSGLPRTAISELHGNMYIE  
VCTSCVPNREYVRVFDVTERTALHRHQVTGRTCHKCGTQLRDTIVHFGERTLGQPLNW  
EAATEAASRADTILCLGSSLKVLKKYPRLWCMTKPPSRRPKLYIVNLQWTPKDDWAALKL  
HGKDDVMRLLMAELGLEIPAYSRVL

---

**Supplementary Table S4.** List of 14 unique sirtuin peptides selected for sirtuin protein quantification. Arg and Lys amino acids highlighted in bold used in 'heavy' peptides, labelled with a stable isotope ( $^{13}\text{C}$  and  $^{15}\text{N}$ ). Precursor charge state for all peptides was 2<sup>+</sup>.

| Sirtuin | Peptide         | Light Precursor<br>Ion <i>m/z</i> | Heavy Precursor<br>Ion <i>m/z</i> |
|---------|-----------------|-----------------------------------|-----------------------------------|
| SIRT1   | DINTIEDAVK      | 559.2904                          | 563.2975                          |
|         | TSVAGTVR        | 395.7245                          | 400.7286                          |
| SIRT2   | LLDEELTLEGVAR   | 664.8746                          | 669.8788                          |
|         | IFSEVTPK        | 460.758                           | 464.7651                          |
| SIRT3   | LYTQNIDGLER     | 661.341                           | 666.3451                          |
|         | VSGIPASK        | 379.724                           | 383.7311                          |
| SIRT4   | RPIQHGFVVR      | 612.8334                          | 617.8376                          |
|         | FILTAWEK        | 504.2817                          | 508.2888                          |
| SIRT5   | VVVITQNIDELHR   | 512.6229                          | 515.9589                          |
|         | NLLEIHGSLFK     | 635.8613                          | 639.8613                          |
| SIRT6   | FLVSQNV DGLHVR  | 742.4044                          | 747.4086                          |
|         | LVIVNLQPTK      | 562.8555                          | 566.8626                          |
| SIRT7   | LLAESADLVTELQGR | 807.9385                          | 812.9426                          |
|         | DTIVHFGER       | 537.2724                          | 542.2765                          |

**Supplementary Table S5.** List of product and transition ions with collision energies used for all 14 selected sirtuin peptides. Each sirtuin protein (SIRT1-7, with 2 peptides per protein) was run with 12 transition ions per run, per protein and with a 50ms dwell time. Precursor charge state for all peptides was 2<sup>+</sup>.

| Precursor Ion <i>m/z</i> | Transition Ion | Peptide                     | Declustering Potential | Collision Energy |
|--------------------------|----------------|-----------------------------|------------------------|------------------|
| 559.2904                 | 889.4625       | SIRT1.DINTIEDAVK.y8.light   | 71.9                   | 27.6             |
| 559.2904                 | 775.4196       | SIRT1.DINTIEDAVK.y7.light   | 71.9                   | 27.6             |
| 559.2904                 | 674.3719       | SIRT1.DINTIEDAVK.y6.light   | 71.9                   | 27.6             |
| 563.2975                 | 897.4767       | SIRT1.DINTIEDAVK.y8.heavy   | 71.9                   | 27.6             |
| 563.2975                 | 783.4338       | SIRT1.DINTIEDAVK.y7.heavy   | 71.9                   | 27.6             |
| 563.2975                 | 682.3861       | SIRT1.DINTIEDAVK.y6.heavy   | 71.9                   | 27.6             |
| 395.7245                 | 602.362        | SIRT1.TSVAGTVR.y6.light     | 60                     | 18.3             |
| 395.7245                 | 503.2936       | SIRT1.TSVAGTVR.y5.light     | 60                     | 18.3             |
| 395.7245                 | 432.2565       | SIRT1.TSVAGTVR.y4.light     | 60                     | 18.3             |
| 400.7286                 | 612.3703       | SIRT1.TSVAGTVR.y6.heavy     | 60                     | 18.3             |
| 400.7286                 | 513.3019       | SIRT1.TSVAGTVR.y5.heavy     | 60                     | 18.3             |
| 400.7286                 | 442.2648       | SIRT1.TSVAGTVR.y4.heavy     | 60                     | 18.3             |
| 664.8746                 | 858.5043       | SIRT2.LLDELTLEGVAR.y8.light | 79.6                   | 33.6             |
| 664.8746                 | 745.4203       | SIRT2.LLDELTLEGVAR.y7.light | 79.6                   | 33.6             |
| 664.8746                 | 644.3726       | SIRT2.LLDELTLEGVAR.y6.light | 79.6                   | 33.6             |
| 669.8788                 | 868.5126       | SIRT2.LLDELTLEGVAR.y8.heavy | 79.6                   | 33.6             |
| 669.8788                 | 755.4285       | SIRT2.LLDELTLEGVAR.y7.heavy | 79.6                   | 33.6             |
| 669.8788                 | 654.3809       | SIRT2.LLDELTLEGVAR.y6.heavy | 79.6                   | 33.6             |
| 460.758                  | 807.4247       | SIRT2.IFSEVTPK.y7.light     | 64.7                   | 22               |
| 460.758                  | 660.3563       | SIRT2.IFSEVTPK.y6.light     | 64.7                   | 22               |
| 460.758                  | 573.3243       | SIRT2.IFSEVTPK.y5.light     | 64.7                   | 22               |
| 464.7651                 | 815.4389       | SIRT2.IFSEVTPK.y7.heavy     | 64.7                   | 22               |
| 464.7651                 | 668.3705       | SIRT2.IFSEVTPK.y6.heavy     | 64.7                   | 22               |
| 464.7651                 | 581.3385       | SIRT2.IFSEVTPK.y5.heavy     | 64.7                   | 22               |
| 661.341                  | 944.4796       | SIRT3.LYTQNIDGLER.y8.light  | 79.3                   | 33.4             |
| 661.341                  | 816.421        | SIRT3.LYTQNIDGLER.y7.light  | 79.3                   | 33.4             |
| 661.341                  | 702.3781       | SIRT3.LYTQNIDGLER.y6.light  | 79.3                   | 33.4             |
| 666.3451                 | 954.4879       | SIRT3.LYTQNIDGLER.y8.heavy  | 79.3                   | 33.4             |
| 666.3451                 | 826.4293       | SIRT3.LYTQNIDGLER.y7.heavy  | 79.3                   | 33.4             |
| 666.3451                 | 712.3863       | SIRT3.LYTQNIDGLER.y6.heavy  | 79.3                   | 33.4             |
| 379.724                  | 659.3723       | SIRT3.VSGIPASK.y7.light     | 58.8                   | 17.4             |
| 379.724                  | 572.3402       | SIRT3.VSGIPASK.y6.light     | 58.8                   | 17.4             |
| 379.724                  | 515.3188       | SIRT3.VSGIPASK.y5.light     | 58.8                   | 17.4             |
| 383.7311                 | 667.3865       | SIRT3.VSGIPASK.y7.heavy     | 58.8                   | 17.4             |

|          |          |                                |      |      |
|----------|----------|--------------------------------|------|------|
| 383.7311 | 580.3544 | SIRT3.VSGIPASK.y6.heavy        | 58.8 | 17.4 |
| 383.7311 | 523.333  | SIRT3.VSGIPASK.y5.heavy        | 58.8 | 17.4 |
| 612.8334 | 1068.559 | SIRT4.RPIQHGDFVR.y9.light      | 75.8 | 30.7 |
| 612.8334 | 971.5057 | SIRT4.RPIQHGDFVR.y8.light      | 75.8 | 30.7 |
| 612.8334 | 858.4217 | SIRT4.RPIQHGDFVR.y7.light      | 75.8 | 30.7 |
| 617.8376 | 1078.567 | SIRT4.RPIQHGDFVR.y9.heavy      | 75.8 | 30.7 |
| 617.8376 | 981.514  | SIRT4.RPIQHGDFVR.y8.heavy      | 75.8 | 30.7 |
| 617.8376 | 868.4299 | SIRT4.RPIQHGDFVR.y7.heavy      | 75.8 | 30.7 |
| 504.2817 | 747.4036 | SIRT4.FILTAWEK.y6.light        | 67.9 | 24.5 |
| 504.2817 | 634.3195 | SIRT4.FILTAWEK.y5.light        | 67.9 | 24.5 |
| 504.2817 | 533.2718 | SIRT4.FILTAWEK.y4.light        | 67.9 | 24.5 |
| 508.2888 | 755.4178 | SIRT4.FILTAWEK.y6.heavy        | 67.9 | 24.5 |
| 508.2888 | 642.3337 | SIRT4.FILTAWEK.y5.heavy        | 67.9 | 24.5 |
| 508.2888 | 541.286  | SIRT4.FILTAWEK.y4.heavy        | 67.9 | 24.5 |
| 512.6229 | 896.4585 | SIRT5.VVVITQNIDELHR.y7.light   | 68.5 | 23   |
| 512.6229 | 782.4155 | SIRT5.VVVITQNIDELHR.y6.light   | 68.5 | 23   |
| 512.6229 | 669.3315 | SIRT5.VVVITQNIDELHR.y5.light   | 68.5 | 23   |
| 515.9589 | 906.4667 | SIRT5.VVVITQNIDELHR.y7.heavy   | 68.5 | 23   |
| 515.9589 | 792.4238 | SIRT5.VVVITQNIDELHR.y6.heavy   | 68.5 | 23   |
| 515.9589 | 679.3397 | SIRT5.VVVITQNIDELHR.y5.heavy   | 68.5 | 23   |
| 635.8613 | 930.5043 | SIRT5.NLLEIHGSLFK.y8.light     | 77.5 | 32   |
| 635.8613 | 801.4618 | SIRT5.NLLEIHGSLFK.y7.light     | 77.5 | 32   |
| 635.8613 | 688.3777 | SIRT5.NLLEIHGSLFK.y6.light     | 77.5 | 32   |
| 639.8684 | 938.5185 | SIRT5.NLLEIHGSLFK.y8.heavy     | 77.5 | 32   |
| 639.8684 | 809.4759 | SIRT5.NLLEIHGSLFK.y7.heavy     | 77.5 | 32   |
| 639.8684 | 696.3919 | SIRT5.NLLEIHGSLFK.y6.heavy     | 77.5 | 32   |
| 742.4044 | 1124.581 | SIRT6.FLVSQNV DGLHVR.y10.light | 85.2 | 38.1 |
| 742.4044 | 909.4901 | SIRT6.FLVSQNV DGLHVR.y8.light  | 85.2 | 38.1 |
| 742.4044 | 696.3787 | SIRT6.FLVSQNV DGLHVR.y6.light  | 85.2 | 38.1 |
| 747.4086 | 1134.589 | SIRT6.FLVSQNV DGLHVR.y10.heavy | 85.2 | 38.1 |
| 747.4086 | 919.4984 | SIRT6.FLVSQNV DGLHVR.y8.heavy  | 85.2 | 38.1 |
| 747.4086 | 706.387  | SIRT6.FLVSQNV DGLHVR.y6.heavy  | 85.2 | 38.1 |
| 562.8555 | 912.5513 | SIRT6.LVIVNLQPTK.y8.light      | 72.1 | 27.8 |
| 562.8555 | 799.4672 | SIRT6.LVIVNLQPTK.y7.light      | 72.1 | 27.8 |
| 562.8555 | 700.3988 | SIRT6.LVIVNLQPTK.y6.light      | 72.1 | 27.8 |
| 566.8626 | 920.5655 | SIRT6.LVIVNLQPTK.y8.heavy      | 72.1 | 27.8 |
| 566.8626 | 807.4814 | SIRT6.LVIVNLQPTK.y7.heavy      | 72.1 | 27.8 |
| 566.8626 | 708.413  | SIRT6.LVIVNLQPTK.y6.heavy      | 72.1 | 27.8 |
| 807.9385 | 915.5258 | SIRT7.LLAESADLVTELQGR.y8.light | 90   | 41.8 |
| 807.9385 | 802.4417 | SIRT7.LLAESADLVTELQGR.y7.light | 90   | 41.8 |
| 807.9385 | 703.3733 | SIRT7.LLAESADLVTELQGR.y6.light | 90   | 41.8 |

|          |          |                                |      |      |
|----------|----------|--------------------------------|------|------|
| 812.9426 | 925.5341 | SIRT7.LLAESADLVTELQGR.y8.heavy | 90   | 41.8 |
| 812.9426 | 812.45   | SIRT7.LLAESADLVTELQGR.y7.heavy | 90   | 41.8 |
| 812.9426 | 713.3816 | SIRT7.LLAESADLVTELQGR.y6.heavy | 90   | 41.8 |
| 537.2724 | 958.5105 | SIRT7.DTIVHFGGER.y8.light      | 70.3 | 26.4 |
| 537.2724 | 857.4628 | SIRT7.DTIVHFGGER.y7.light      | 70.3 | 26.4 |
| 537.2724 | 744.3787 | SIRT7.DTIVHFGGER.y6.light      | 70.3 | 26.4 |
| 542.2765 | 968.5188 | SIRT7.DTIVHFGGER.y8.heavy      | 70.3 | 26.4 |
| 542.2765 | 867.4711 | SIRT7.DTIVHFGGER.y7.heavy      | 70.3 | 26.4 |
| 542.2765 | 754.387  | SIRT7.DTIVHFGGER.y6.heavy      | 70.3 | 26.4 |

**Supplementary Table S6.** Human frontal lobe brain tissue sample and subject details.

| <b>Patient</b> | <b>Sex</b> | <b>Age at death</b> | <b>Post mortem tissue collection time</b> |
|----------------|------------|---------------------|-------------------------------------------|
| 1              | Male       | 72                  | 24h                                       |
| 2              | Female     | 71                  | 24h                                       |
| 3              | Male       | 72                  | 24h                                       |
| 4              | Male       | 71                  | 29h                                       |
| 5              | Male       | 54                  | 24h                                       |



**Supplementary Table S7.** Real-time primer sequences used for PCR analysis.

| <b>Primer name</b> | <b>Oligo name</b> | <b>Sequence (5'→3')</b>         |
|--------------------|-------------------|---------------------------------|
| SIRT1-Forw         | NM_012238-Forw    | CAC-CAG-AAA-GAA-CTT-CAC-CAC-CAG |
| SIRT1-Rev          | NM_012238-Rev     | ACC-ATC-AAG-CCG-CCT-ACT-AAT-CTG |
| SIRT2-Forw         | AJ505014-Forw     | AGG-GAC-AAG-GAG-CAG-GGT-TC      |
| SIRT2-Rev          | AJ505014-Rev      | GAA-GAG-AGA-CAG-CGG-CAG-GAC     |
| SIRT3-Forw         | NM_12239-Forw     | GAG-GTT-CTT-GCT-GCA-TGT-GGT-TG  |
| SIRT3-Rev          | NM_12239-Rev      | AGT-TTC-CCG-CTG-CAC-AAG-GTC     |
| SIRT4-Forw         | NM_012240-Forw    | TTG-TGC-CAG-CAA-GTC-CTC-CTC     |
| SIRT4-Rev          | NM_012240-Rev     | GTC-TCT-TGG-AAA-GGG-TGA-TGA-AGC |
| SIRT5-Forw         | NM_12241-Forw     | TCC-AGC-GTC-CAC-ACG-AAA-CC      |
| SIRT5-Rev          | NM_12241-Rev      | AAC-ACC-AGC-TCC-TGA-GAT-GAT-GAC |
| SIRT6-Forw         | NM_016539-Forw    | GCT-GGA-GCC-CAA-GGA-GGA-ATC     |
| SIRT6-Rev          | NM_016539-Rev     | AGT-AAC-AAA-GTG-AGA-CCA-CGA-GAG |
| SIRT7-Forw         | NM_016538-Forw    | GAG-CCA-ACC-CTC-ACC-CAC-ATG     |
| SIRT7-Rev          | NM_016538-Rev     | ACG-CAG-GAG-GTA-CAG-ACT-TCA-ATG |
| GAPDH-Forw         | NM_017008-Forw    | TGG-AGT-CTA-CTG-GCG-TCT-T       |
| GAPDH-Rev          | NM_017008-Rev     | TGT-CAT-ATT-TCT-CGT-GGT-TCA     |

**Supplementary Table S8.** Antibodies and dilutions used for western blotting.

| <b>Antibody</b>         | <b>Dilution</b> | <b>Manufacturer</b>   |
|-------------------------|-----------------|-----------------------|
| Rabbit Polyclonal SIRT1 | 1:1000          | Abcam (Cambridge, UK) |
| Rabbit Polyclonal SIRT2 | 1:1000          | Abcam (Cambridge, UK) |
| Rabbit Polyclonal SIRT3 | 1:1000          | Abcam (Cambridge, UK) |

**Supplementary Figure S1.** Representative chromatograms for all 14 sirtuin peptides used in the MRM method, showing transition ions, retention times and signal intensities. The vertical dotted lines either side of the peak clusters indicate the boundaries for peak area integration.

**SIRT1 DINTIEDAVK** (precursor mass,  $2^+$   $m/z$  = 559.2904)

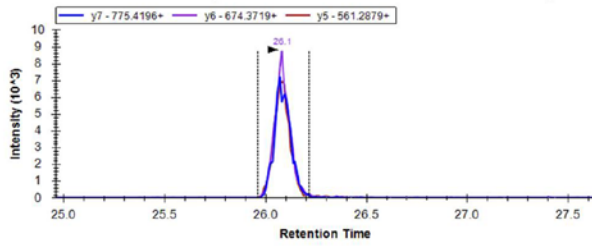

**SIRT1 TSVAGTVR** (precursor mass,  $2^+$   $m/z$  = 395.7245)

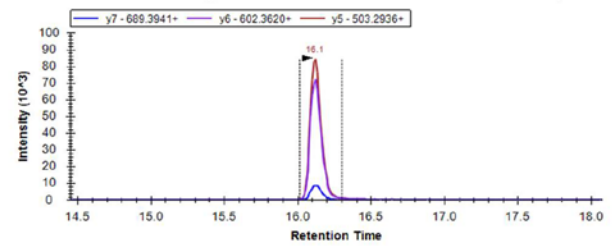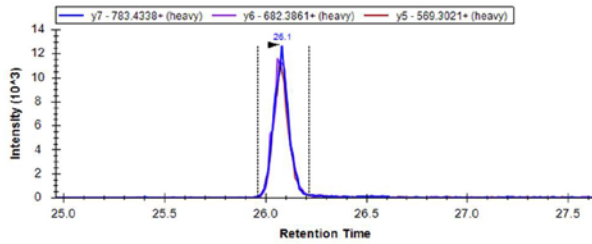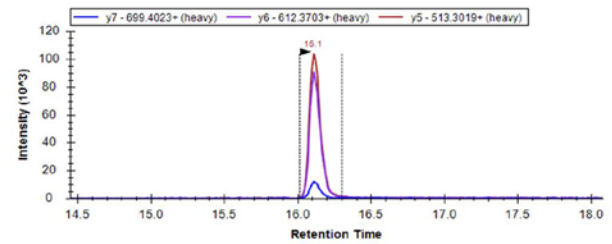

**SIRT2 IFSEVTPK** (precursor mass,  $2^+$   $m/z$  = 460.758)

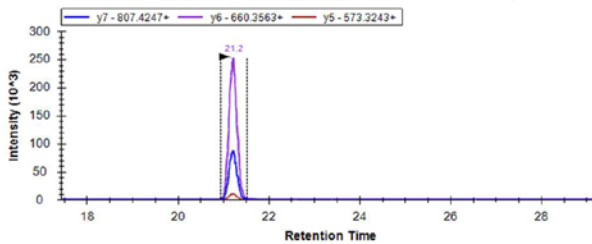

**SIRT 2 LLDEELTLEGVAR** (precursor mass,  $2^+$   $m/z$  = 664.8746)

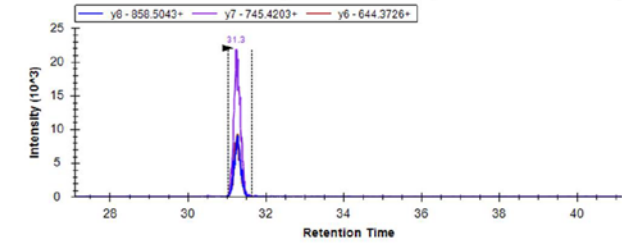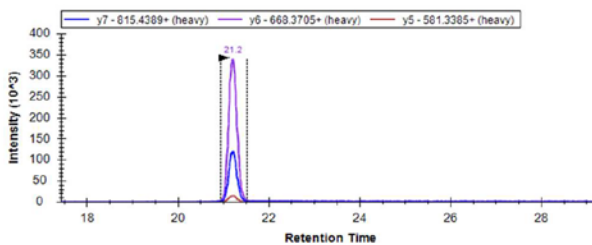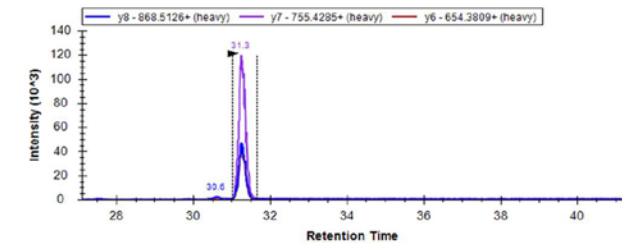

**SIRT3 LYTQNI DGLER** (precursor mass,  $2^+$   $m/z$  = 661.341)

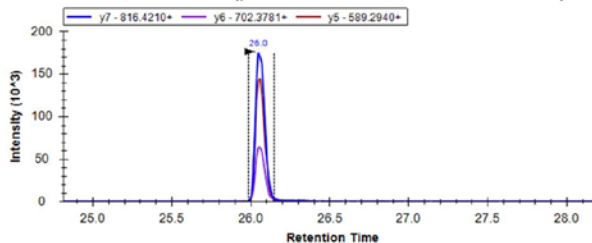

**SIRT3 VSGIPASK** (precursor mass,  $2^+$   $m/z$  = 379.24)

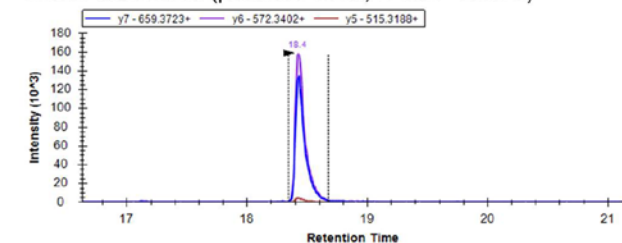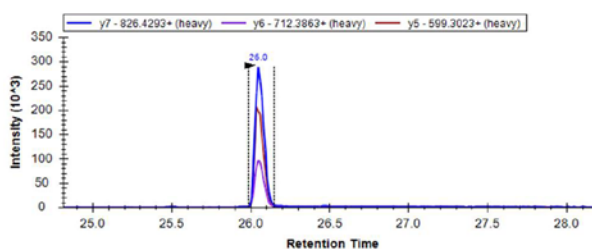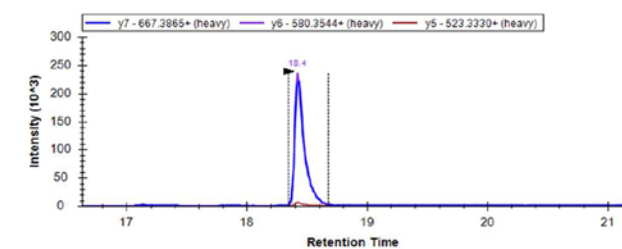

Supplementary Figure S1 continued.

**SIRT4 FILTAWEK** (precursor mass,  $2^+$   $m/z$  = 612.8334)

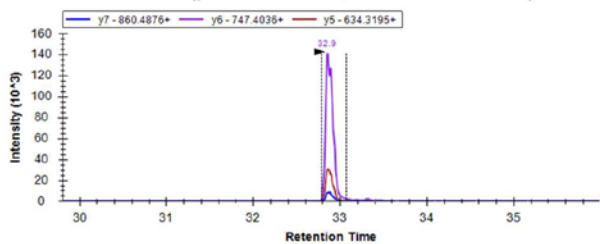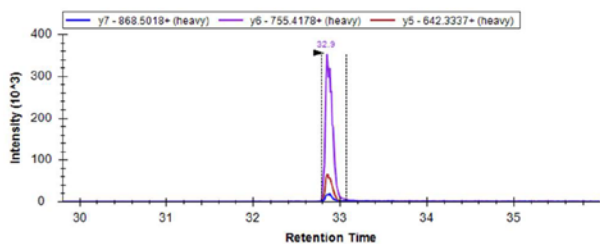

**SIRT5 VVITQIDELHR** (precursor mass,  $2^+$   $m/z$  = 512.6229)

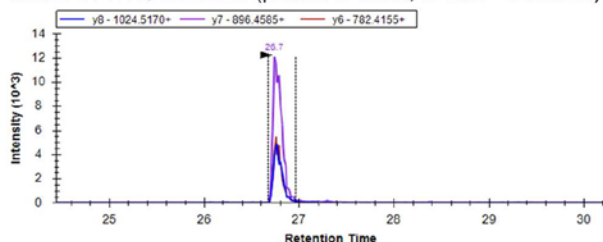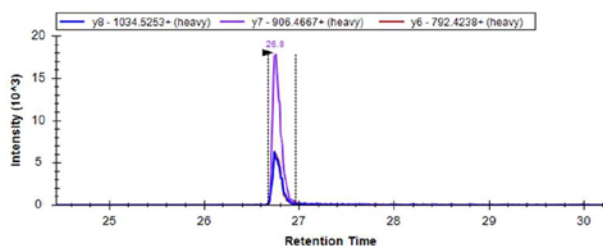

**SIRT5 NLEIHGSLFK** (precursor mass,  $2^+$   $m/z$  = 635.8613)

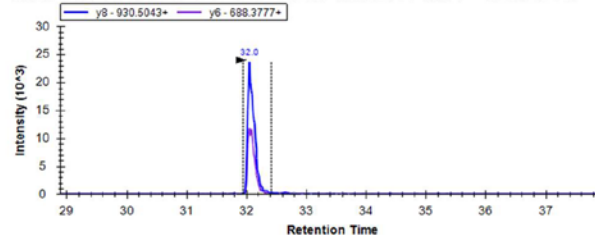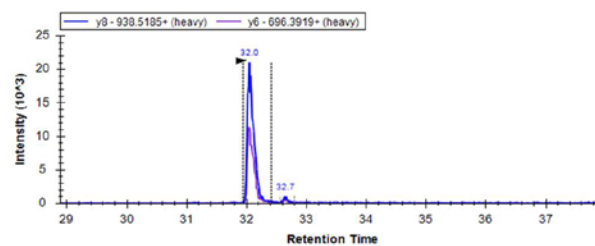

**SIRT6 FLVSQNV DGLHVR** (precursor mass,  $2^+$   $m/z$  = 742.4044)

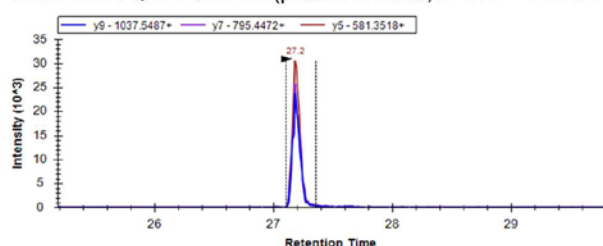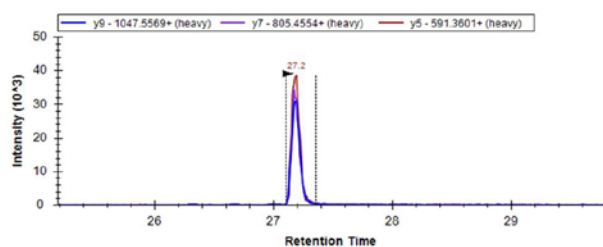

**SIRT6 LVIVNLQPTK** (precursor mass,  $2^+$   $m/z$  = 562.8555)

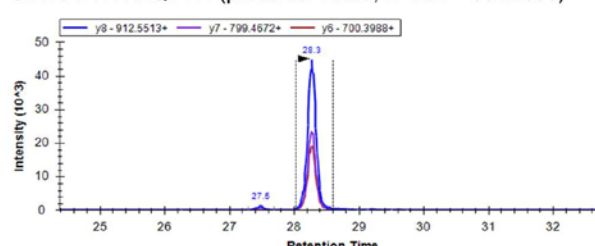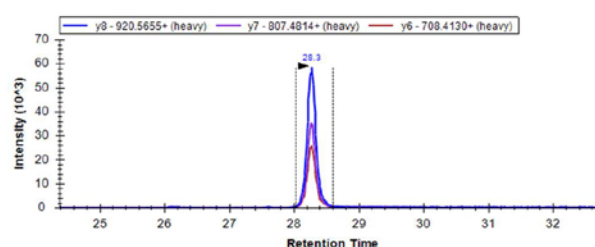

## Supplementary Figure S1 continued.

SIRT7 DTIVHFGER (precursor mass,  $2^+$   $m/z$  = 537.2724)

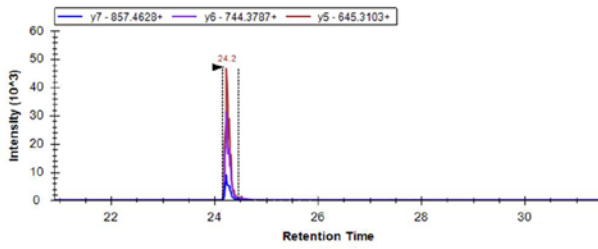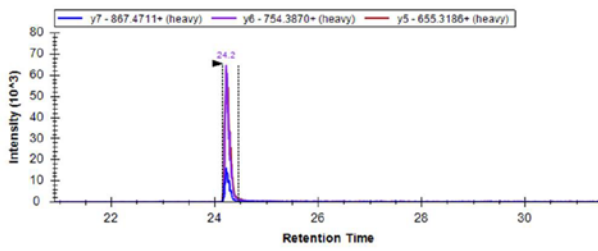

SIRT7 LLAESADLVTELQGR (precursor mass,  $2^+$   $m/z$  = 807.9385)

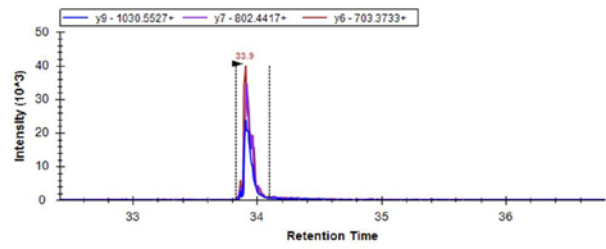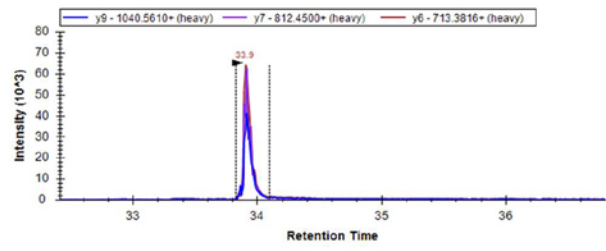

**Supplementary Figure S2.** Sirtuin peptide standard curves prepared in several matrices, including buffer only, a blank gel control, a gel containing low abundance plasma proteins (see Supplementary Figure S7 for the gel used for the gel matrices).

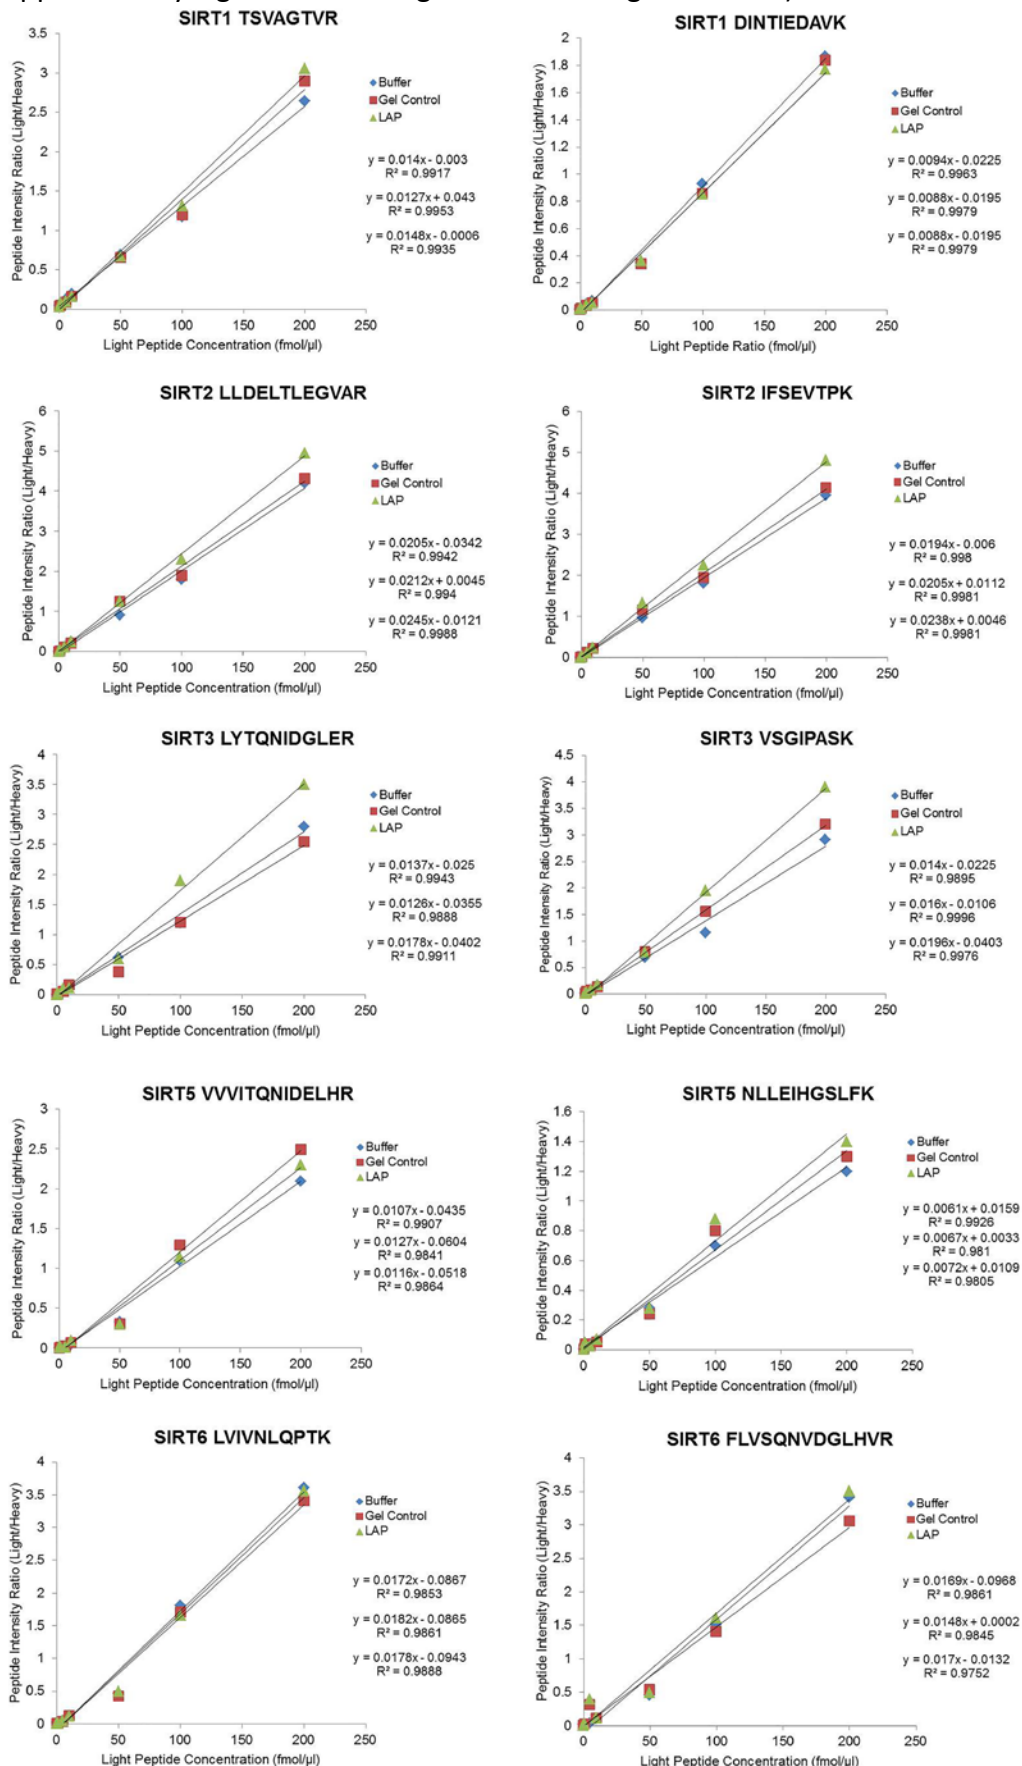

**Supplementary Figure S3.** Sample fractionation and MRM workflow.

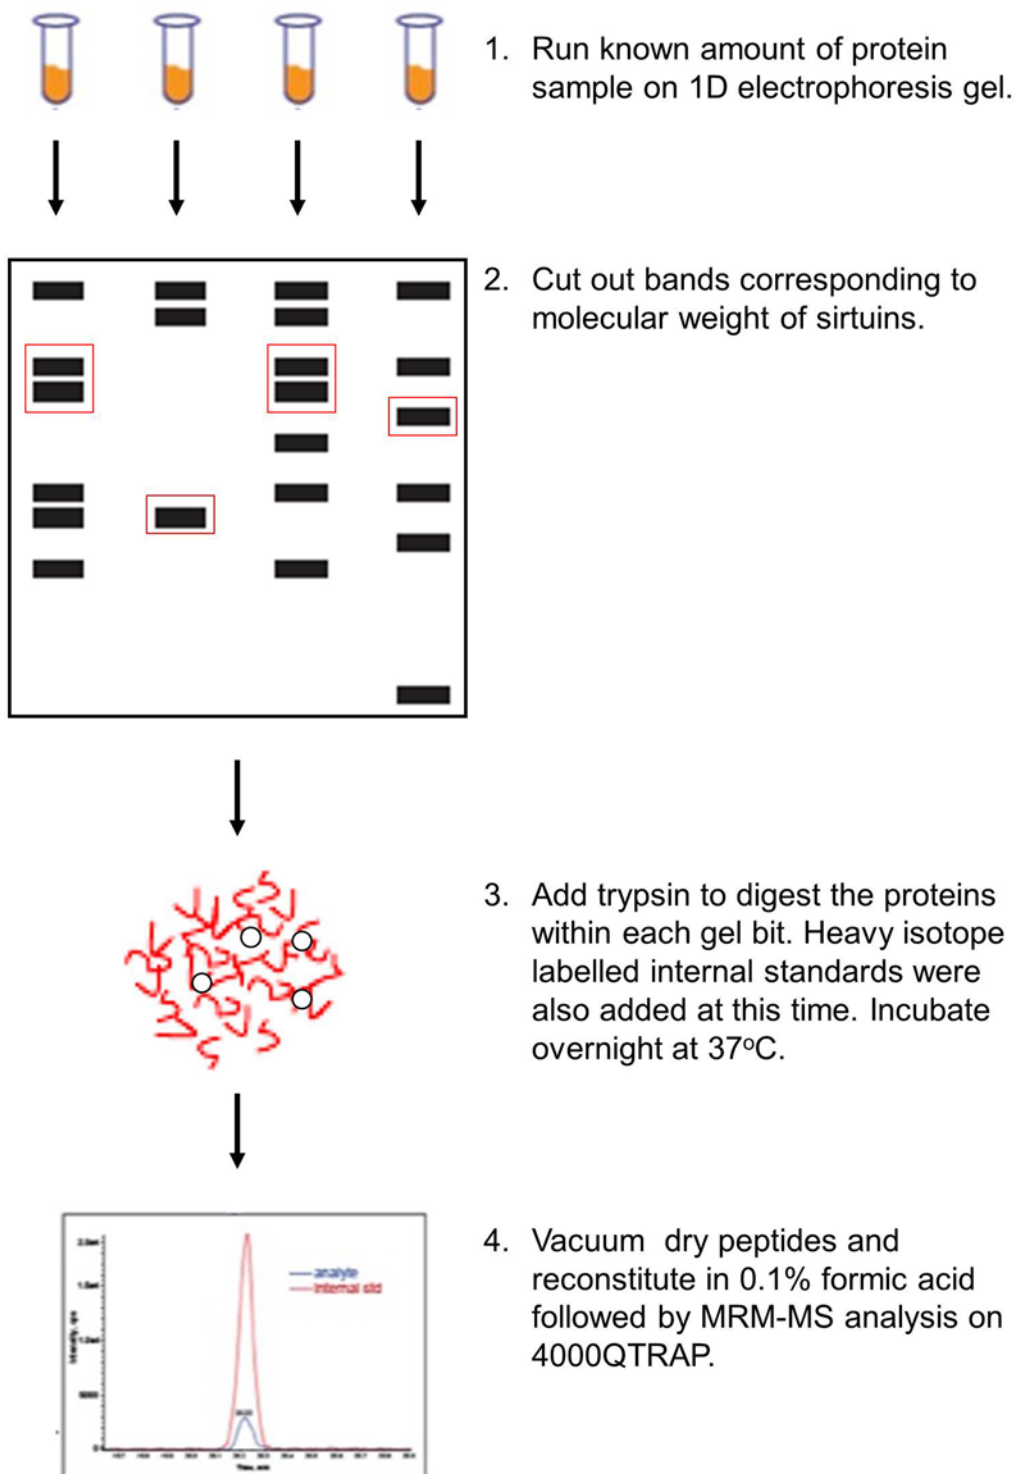

**Supplementary Figure S4.** Full length western blots of SIRT1-3 protein expression in human control frontal lobe brain tissue (n=3 individuals) at molecular weights of approx 40kDa, 50kDa and 30kDa respectively. All blots were run under the same experimental protocols with 1:1000 dilution of primary antibodies. The exposure times shown are 3hrs, 30sec and overnight for SIRT1, SIRT2 and SIRT3 respectively.

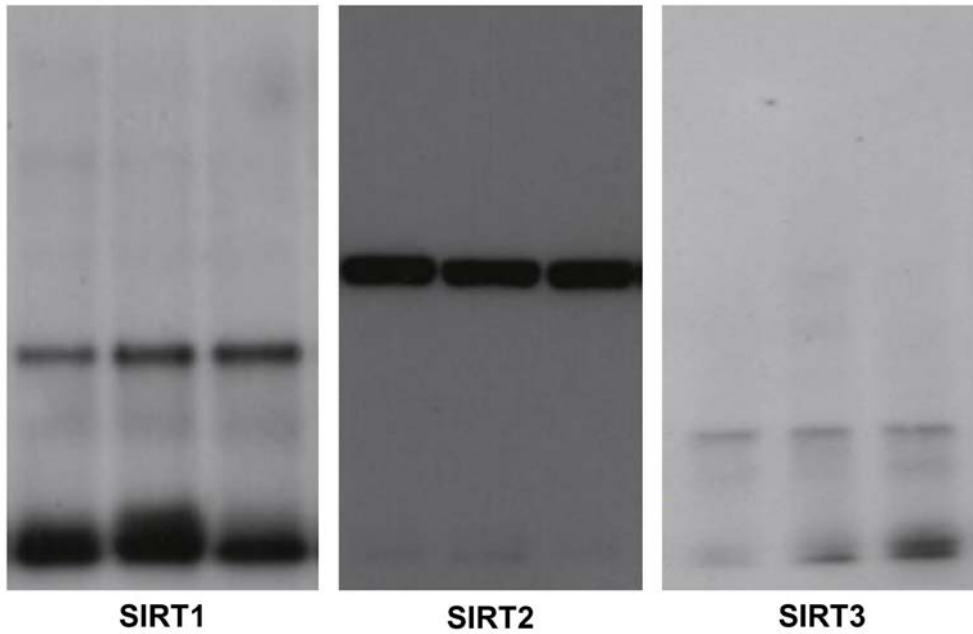

**Supplementary Figure S5.** SIRT1 levels in CSF and depleted plasma. SIRT1 levels in CSF (n=5) samples and a plasma sample depleted of the six most abundant plasma proteins (high abundance protein removal was achieved using an Agilent Hu6 affinity column).

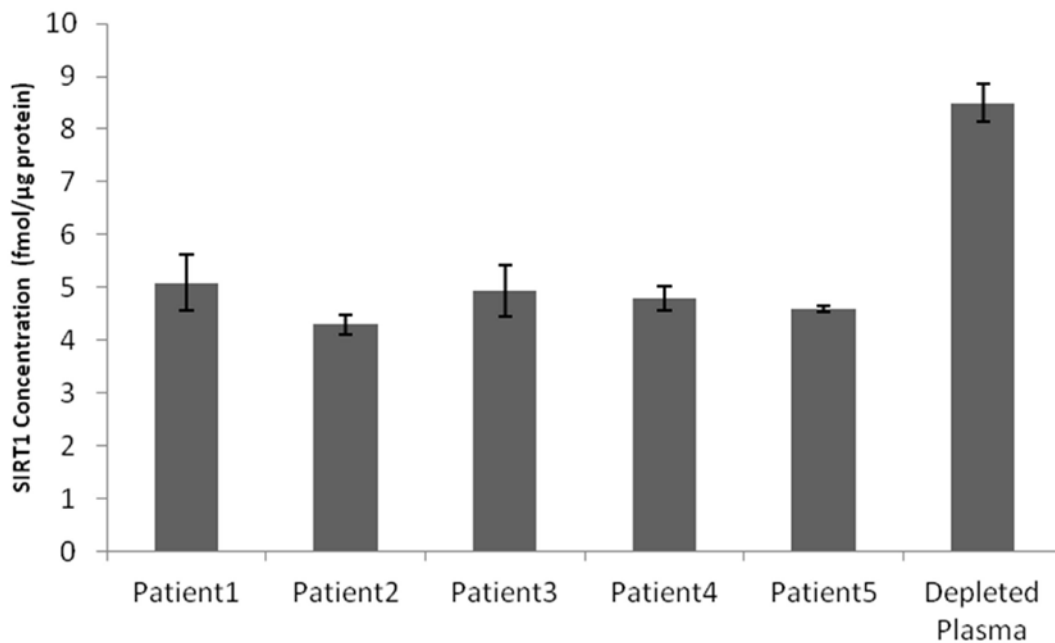

**Supplementary Figure S6.** Representative colloidal coomassie stained SDS PAGE gel of recombinant sirtuin protein standards highlighted in red boxes with the bands cut corresponding to the molecular weight of each full length sirtuin. Note the presence of host cell contaminants in most of the preparations, especially SIRT7, and the particularly low yield of SIRT4. These preparations were adequate to validate good signal intensity for each of the two peptides per sirtuin used for MRM quantification. SIRT1, 2, 3, 5 and 6 were also used to estimate recoveries using the full protocol (see Supplementary Figure S7 and Supplementary Table S1), in buffer only vs LAP spiked samples.

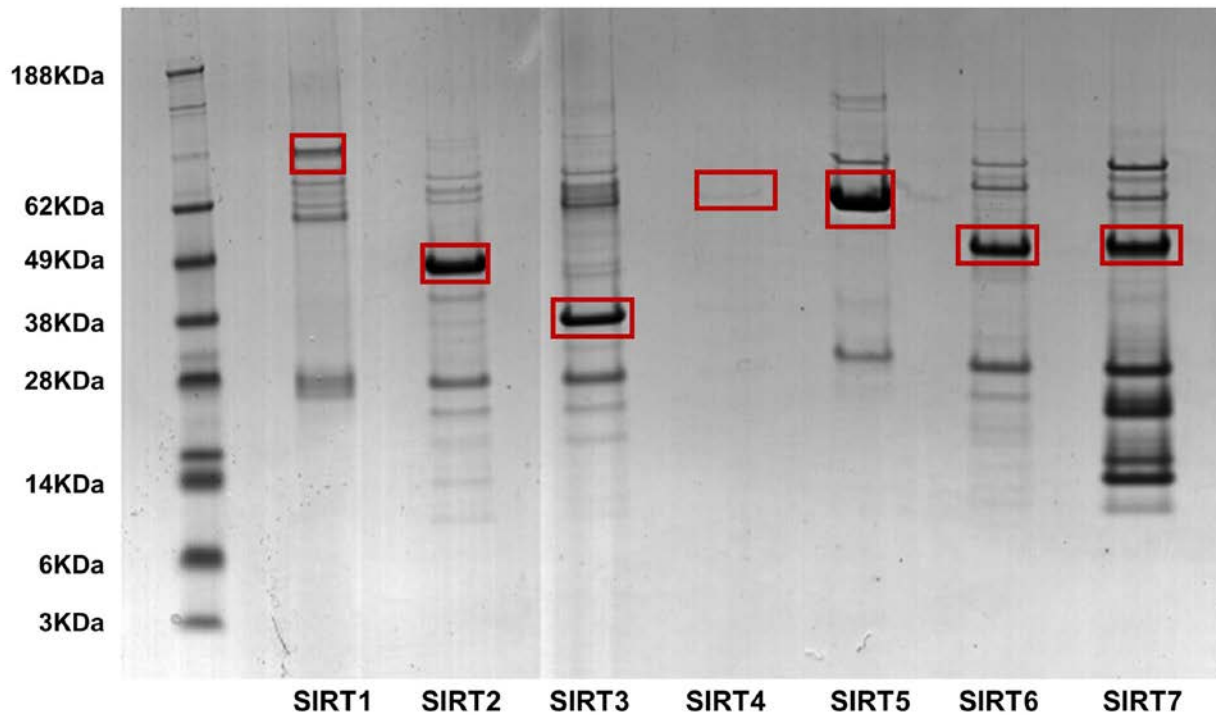



**Supplementary Figure S7.** A typical colloidal coomassie stained SDS/PAGE gel used to assess matrix effects on standard curves. Bands were cut from positions at which intact sirtuin proteins would typically be expected, and used to test matrix effects on the synthetic peptide standards. In addition to this, intact commercial recombinant sirtuin preparations were spiked into depleted plasma and run by SDS/PAGE (see Supplementary Figure S8).

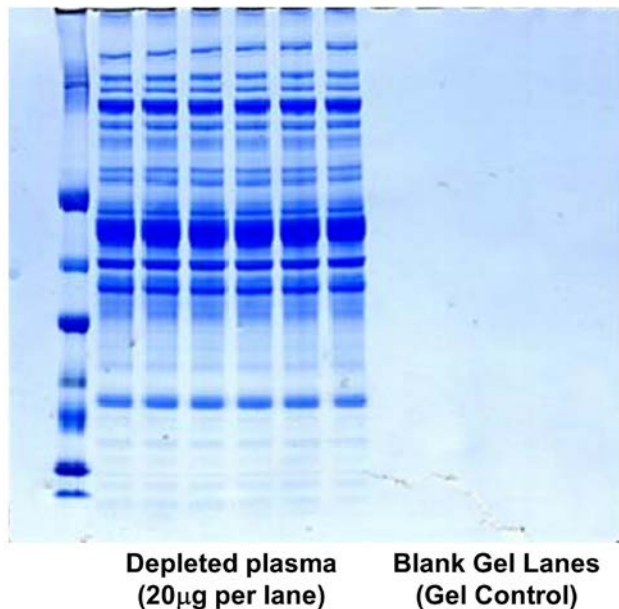

**Supplementary Figure S8.** Colloidal coomassie stained SDS/PAGE gel used for sirtuin recovery experiments. Lane 1: prestained molecular weight markers; Lanes 2-6: commercial SIRT1, 2, 3, 5 and 6 recombinant sirtuin protein standards (5ug per lane. This amount was based on the manufacturer's indicated quantification of vial contents.); Lanes 8-12: 20ug Depleted plasma spiked with 5ug of sirtuin standards 1, 2, 3, 5 and 6; Lanes 14-18: Depleted plasma spiked with 2ug of sirtuin standards 1, 2, 3, 5 and 6. Sirtuins 4 and 7 were not used for this experiment as the SIRT4 yield was very low, and SIRT7 was particularly impure (see Supplementary Figure S6).

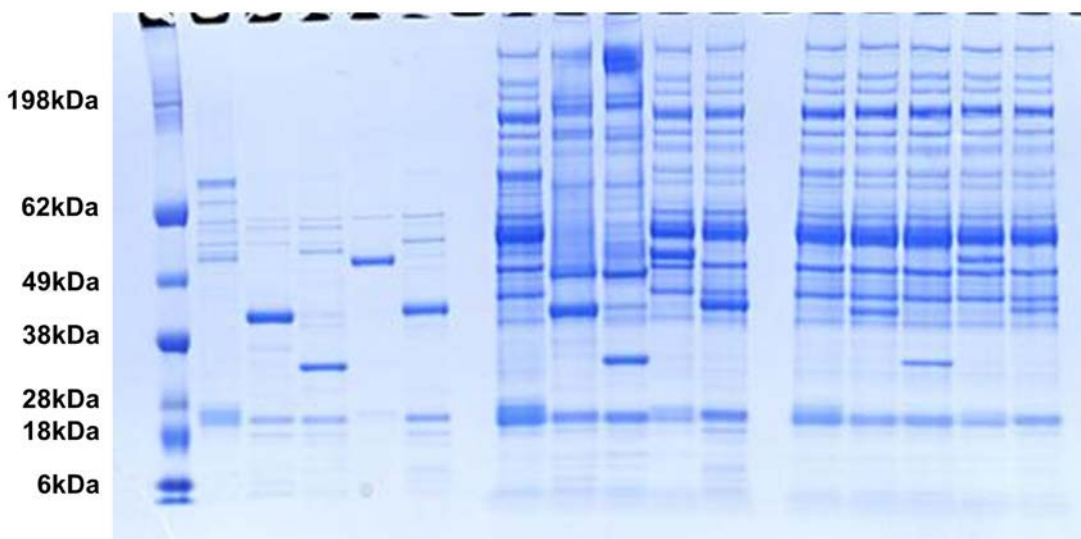

Supplement: srep35391-s1.pdf [file srep35391-s1.pdf]
